# Supplementary material for: Gold nanoparticle-based immunochromatographic assay for the rapid detection of the SARS-CoV-2 Omicron variant
Source: Royal Society of Chemistry journal article supplement (doi:10.1039/d3qm00624g), 2023-01-01
Supplement: d3qm00624g1.pdf [file d3qm00624g1.pdf]

## *Supporting information*

# **Gold nanoparticle-based immunochromatographic assay for rapid detection of the SARS-CoV-2 Omicron variant**

## **Methods**

### **Conjugation of the mAb to HRP**

Conjugation of the mAb to HRP was performed as previously reported,<sup>1,2</sup> with slight modifications. Briefly, 0.2 mL of 10 mg/mL HRP and 0.2 mL of 0.06 M NaIO<sub>4</sub> were reacted for 30 min at 4 °C, and this caused the generation of aldehyde groups by oxidation of the hydroxyl groups on HRP. Next, 0.2 mL of 0.16 M glycol was added to the mixture to eliminate the excess NaIO<sub>4</sub> at room temperature. After this, 2 mg of purified mAb was added and the pH was adjusted to 9 by the addition of 0.05 M carbonate buffer, in which aldehyde groups could be linked to the amino groups of the antibody to produce the corresponding Schiff bases. After stirring for 20 h at 4 °C, a stable HRP-antibody conjugate was formed by adding 90 µL of 5 mg/mL NaBH<sub>4</sub> and precipitating by the addition of an equal volume of saturated ammonium sulfate solution. After centrifugation for 10 min at 5000 × g, the pellet was resuspended with 0.01 M PBS (pH 7.4). The HRP-antibody conjugation was dialyzed against 0.01 M PBS for 36 h at 4 °C and then added to an equal volume of glycerol, and stored at 20 °C for long-term storage. All the reactions, including the dialysis should be protected from light and the HRP-antibody conjugation was characterized by direct ELISA. The purified mAbs and the HRP-mAb conjugations were then paired with each other in a

sandwich ELISA format.

## Contents

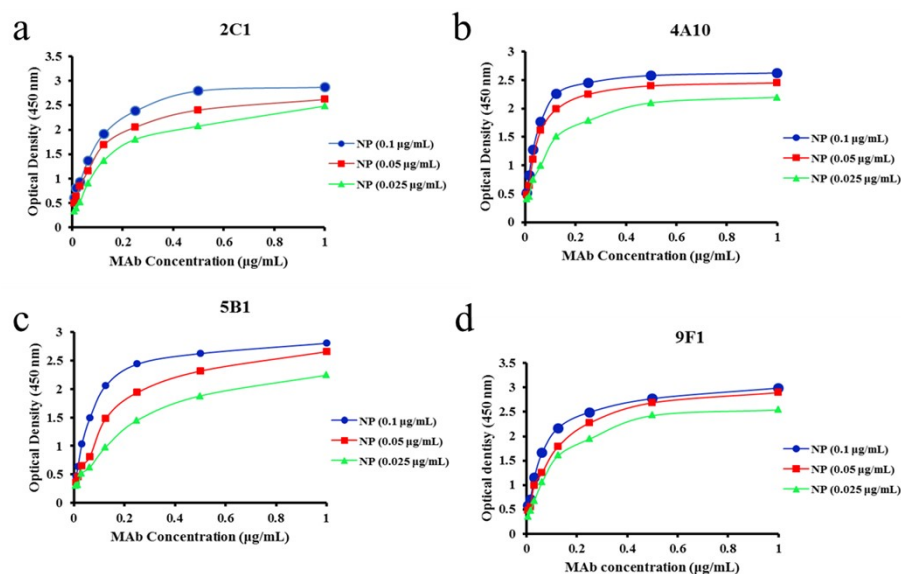

**Figure S1.** Affinity measurement of selected mAbs by ELISA; affinity constant ( $K_a$ ) was determined from sigmoidal curves constructed based on different concentrations of NP antigen and mAbs. (a) 2C1; (b) 4A10; (c) 5B1; (d) 9F1.

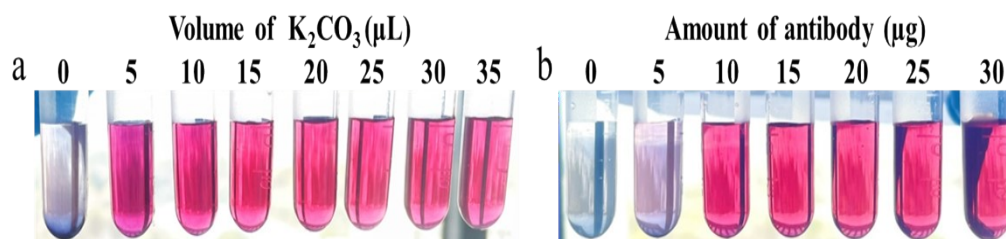

**Figure S2.** Optimization of pH value and antibody labeling amount. (a) The optimal volume of  $K_2CO_3$  for the conjugation of mAbs with GNPs was evaluated by the color. (b) The color was used to evaluate the optimal amount of antibody of synthetic GNP-mAb.

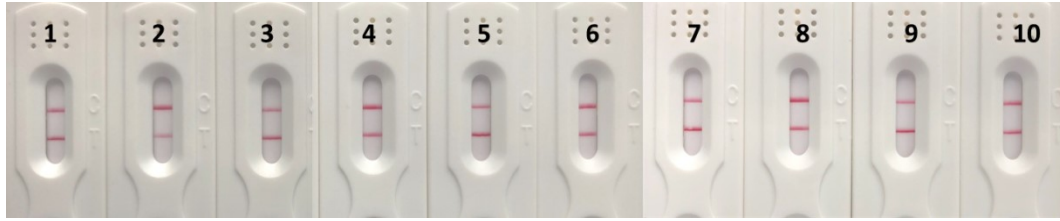

**Figure S3.** Ten RT-PCR positive patients measured with this test strips

## References

1. R. C. Freed, M. L. Evenson, R. F. Reiser and M. S. Bergdoll, Enzyme-linked immunosorbent assay for detection of staphylococcal enterotoxins in foods, *Appl. Environ. Microbiol.*, 1982, **44**, 1349-1355.
2. H. Kuang, W. Wang, L. Xu, W. Ma, L. Liu, L. Wang and C. Xu, Monoclonal antibody-based sandwich ELISA for the detection of staphylococcal enterotoxin A, *Int. J. Environ. Res. Public Health*, 2013, **10**, 1598-1608.
